# Supplementary material for: Examining Cultural Differences in the Associations between Appraisals and Emotion Regulation and PostTraumatic Stress Disorder in Malaysian and Australian Trauma Survivors
Source: MDPI journal article supplement (doi:10.3390/ijerph19031163), 2022-01-21
Supplement: s1 [file s1]

**Supplemental Table S1**

Correlation analyses for each cultural group separately

|                                 | Australian Group | Malaysian Group |
|---------------------------------|------------------|-----------------|
|                                 | PTSD Symptoms    | PTSD Symptoms   |
| Self-Blame                      | .57**            | .23*            |
| Negative Self                   | .67**            | .58**           |
| Negative World                  | .57**            | .51**           |
| PTCI Total                      | .68**            | .56**           |
| Primary Control                 | .01              | .26*            |
| Secondary Control               | -.17             | -.11            |
| Fatalism                        | .11              | .09             |
| Chinese Beliefs about Adversity | -.25*            | -.18*           |
| Trauma-Specific Rumination      | .62**            | .65**           |
| Rumination - Brooding           | .42**            | .59**           |
| Rumination - Reappraisal        | .38**            | .44**           |
| Reappraisal                     | .003             | -.17            |
| Suppression                     | .25*             | .35*            |
| Enhance positivity              | -.14             | -.24*           |
| Perspective taking              | .06              | -.04            |
| Soothing                        | -.06             | -.09            |
| Social modelling                | -.08             | -.10            |
| IERQ total                      | -.07             | -.14            |

\* $p < .05$ ; \*\*  $p < .01$ . *Note.* PTCI= Posttraumatic Cognitions Inventory, IERQ= Interpersonal Emotion Regulation Questionnaire. PTSD = Posttraumatic stress disorder.

## Supplemental Table S2

Summary of Moderation Results with Posttraumatic Stress Disorder Symptoms as the Outcome Variable.

|                                                            | <i>b</i><br>[95% CI]    | <i>SE</i> | <i>t</i> |
|------------------------------------------------------------|-------------------------|-----------|----------|
| <b>Self-Blame</b> $R^2=.23$ , $F(7, 203)= 8.42^{**}$       |                         |           |          |
| Constant                                                   | 40.71<br>[24.56-56.86]  | 8.19      | 4.97***  |
| Self-Blame                                                 | -.48<br>[-1.37-.40]     | .45       | 1.07     |
| Cultural Group                                             | -19.12<br>[-29.28—8.97] | 5.15      | 3.71***  |
| Self-Blame x Cultural Group                                | .98<br>[.39-1.56]       | .30       | 3.29**   |
| <b>Negative Self</b> $R^2=.42$ , $F(7, 203)= 21.01^{***}$  |                         |           |          |
| Constant                                                   | 15.16<br>[-.23-30.56]   | 7.81      | 1.94     |
| Negative Self                                              | .31<br>[.08-.54]        | .12       | 2.65**   |
| Cultural Group                                             | -7.88<br>[-.17.12-1.35] | 4.86      | 1.68     |
| Negative Self x Cultural Group                             | .07<br>[-.07-.22]       | .07       | .99      |
| <b>Negative World</b> $R^2=.32$ , $F(7, 203)= 13.43^{***}$ |                         |           |          |
| Constant                                                   | 16.55<br>[-3.06-36.16]  | 9.95      | 1.66     |
| Negative World                                             | .60<br>[.004-1.19]      | .30       | 1.99*    |
| Cultural Group                                             | -9.24<br>[-20.95-2.46]  | 5.94      | -1.56    |
| Negative World x Cultural Group                            | .19<br>[-.19-.57]       | .19       | 1.00     |
| <b>Fatalism</b> $R^2=.04$ , $F(7, 203)= 1.32$              |                         |           |          |
| Constant                                                   | 24.60<br>[-10.66-59.85] | 17.88     | 1.38     |
| Fatalism                                                   | .53<br>[-1.18-2.24]     | .87       | .61      |
| Cultural Group                                             | -1.56<br>[-24.03-20.91] | 11.40     | .14      |
| Fatalism x Cultural Group                                  | -.18<br>[-1.24-.89]     | .54       | .33      |
| <b>Beliefs Adversity</b> $R^2=.05$ , $F(7, 203)= 1.60$     |                         |           |          |
| Constant                                                   | 52.04<br>[.71-103.38]   | 26.04     | 2.00*    |
| Beliefs Adversity                                          | -.58<br>[-1.94-.78]     | .69       | .84      |

|                                                             |                         |       |        |
|-------------------------------------------------------------|-------------------------|-------|--------|
| Cultural Group                                              | -.90<br>[-32.70-30.90]  | 16.13 | .06    |
| Beliefs Adversity x Cultural Group                          | -.04<br>[-.87-.79]      | .42   | .09    |
| <b>Reappraisal</b> $R^2=.05$ , $F(7, 203)= 1.64$            |                         |       |        |
| Constant                                                    | 14.20<br>[-21.32-49.73] | 18.02 | .79    |
| Reappraisal                                                 | .66<br>[-.59-1.91]      | .63   | 1.04   |
| Cultural Group                                              | 14.15<br>[-10.53-38.82] | 12.52 | 1.13   |
| Reappraisal x Cultural Group                                | -.61<br>[-1.44-.21]     | .42   | 1.46   |
| <b>Suppression</b> $R^2=.13$ , $F(7, 203)= 4.34^{***}$      |                         |       |        |
| Constant                                                    | 29.79<br>[2.85-56.73]   | 13.66 | 2.18*  |
| Suppression                                                 | .38<br>[-1.11-1.87]     | .76   | .50    |
| Cultural Group                                              | -14.62<br>[-31.55-2.30] | 8.59  | 1.70   |
| Suppression x Cultural Group                                | .48<br>[-.47-1.44]      | .48   | .99    |
| <b>Enhancing Positivity</b> $R^2=.08$ , $F(7, 203)= 2.47^*$ |                         |       |        |
| Constant                                                    | 41.67<br>[5.29-78.05]   | 18.45 | 2.26*  |
| Enhancing Positivity                                        | -.30<br>[-2.11-1.52]    | .92   | .32    |
| Cultural Group                                              | .45<br>[-20.49-21.40]   | 10.62 | .04    |
| Enhancing Positivity x Cultural Group                       | -.31<br>[-1.39-.78]     | .55   | .56    |
| <b>Perspective Taking</b> $R^2=.04$ , $F(7, 203)= 1.28$     |                         |       |        |
| Constant                                                    | 26.66<br>[5.41-47.91]   | 10.78 | 2.47*  |
| Perspective taking                                          | .68<br>[-.87-2.23]      | .79   | .86    |
| Cultural Group                                              | .70<br>[-13.74-15.14]   | 7.32  | .10    |
| Perspective Taking x Cultural Group                         | -.42<br>[-1.41-.57]     | .50   | -.84   |
| <b>Soothing</b> $R^2=.05$ , $F(7, 203)= 1.38$               |                         |       |        |
| Constant                                                    | 33.48<br>[9.86-57.10]   | 11.98 | 2.79** |
| Soothing                                                    | .06<br>[-1.44-1.56]     | .76   | .08    |
| Cultural Group                                              | -1.11<br>[-16.06-13.85] | 7.58  | .15    |
| Soothing x Cultural Group                                   | -.21<br>[-1.15-.72]     | .47   | .45    |
| <b>Social Modelling</b> $R^2=.05$ , $F(7, 203)= 1.49$       |                         |       |        |

|                                   |                        |       |       |
|-----------------------------------|------------------------|-------|-------|
| Constant                          | 34.55<br>[8.33-60.77]  | 13.30 | 2.60* |
| Social Modelling                  | -.07<br>[-1.67-1.54]   | .81   | .08   |
| Cultural Group                    | -.74<br>[-17.72-16.24] | 8.61  | .09   |
| Social Modelling x Cultural Group | -.20<br>[-1.21-.82]    | .51   | .38   |

\* $p < .05$ ; \*\*  $p < .01$ ; \*\*\* $p < .001$ .

## **Exploratory Analyses – Moderated Mediation Analyses**

### **PTCI**

Interdependent, effect= .03,  $SE$ = .03, 95% CI[-.01, .09], and independent self-construal, effect= .01,  $SE$ = .03, 95% CI[-.05, .07], did not mediate the relationships between self-blame and PTSD symptoms. Interdependent, effect= .002,  $SE$ = .01, 95% CI[-.01, .01], and independent self-construal, effect= -.001,  $SE$ = .01, 95% CI[-.02, .02], did not mediate the relationships between negative self and PTSD symptoms. Interdependent, effect= .01,  $SE$ = .02, 95% CI[-.02, .04], and independent self-construal, effect= .01,  $SE$ = .02, 95% CI[-.02, .04], did not mediate the relationships between negative world and PTSD symptoms.

### **Fatalism and Chinese Cultural Beliefs about Adversity**

Independent self-construal mediated the association between fatalism appraisals and PTSD symptoms, effect= -.12,  $SE$ = .07, 95% CI[-.28, -.01]. There was no evidence of cultural group moderating this conditional indirect effect, index= -.16,  $SE$ = .11, 95% CI[-.42, .01]. Interdependent self-construal did not mediate the relationship between fatalism and PTSD symptoms, effect= .17,  $SE$ = .10, 95% CI[-.002, .38]. There was no evidence for cultural group moderating this mediation effect, index= 0.01,  $SE$ = .08, 95% CI[-.18, .16]. Interdependent self-construal mediated the association between Chinese cultural beliefs about adversity appraisals and PTSD symptoms, effect= .14,  $SE$ = .06, 95% CI[.04, .28]. There was no evidence of cultural group moderating this conditional indirect effect, index= -.05,  $SE$ = .08, 95% CI[-.22, .12]. Independent self-construal did not mediate the relationship between cultural beliefs about adversity and PTSD symptoms, effect= -.08,  $SE$ = .13, 95% CI[-.33, .17]. There was no evidence of cultural group moderating this conditional indirect effect, index= -.01,  $SE$ = .04, 95% CI[-.11, .07].

### **Reappraisal and Suppression**

Interdependent self-construal did mediate the relationship between reappraisal and PTSD symptoms, effect= .14, SE= .07, 95% CI[.02, .28]. There was no evidence of cultural group moderating this indirect effect, index= .03, SE= .08, 95% CI[-.13, .20]. Independent self-construal did not significantly mediate the relationships between reappraisal and PTSD symptoms, effect= -.14, SE= .08, 95% CI[-.30, .02]. There was no evidence of cultural group moderating this indirect effect, index= -.11, SE= .09, 95% CI[-.32, .03]. Interdependent, effect= .06, SE= .05, 95% CI[-.02, .17], and independent, effect= .04, SE= .05, 95% CI[-.04, .15], self-construal did not mediate the relationships between suppression and PTSD symptoms. There was no evidence of cultural group moderating these indirect effects, independent index= -.10, SE= .09, 95% CI[-.30, .05], interdependent index= .01, SE= .06, 95% CI[-.11, .16].

### **Interpersonal Emotion Regulation**

**Enhanced positivity.** Interdependent self-construal mediated the relationships between enhanced positivity and PTSD symptoms effect= .23, SE= .08, 95% CI[.07, .39]. There was no evidence for cultural group moderating this mediation, index= 0.03, SE= .13, 95% CI[-.22, .30]. Independent self-construal did not mediate the relationships between enhanced positivity and PTSD symptoms, effect= -.12, SE= .08, 95% CI[-.29, .02]. There was no evidence for cultural group moderating this mediation, index= -.06, SE= .10, 95% CI[-.30, .10].

**Perspective taking.** Interdependent self-construal mediated the relationships between perspective taking and PTSD symptoms effect= .19, SE= .09, 95% CI[.01, .38]. There was no evidence of cultural group moderating this conditional indirect effect, index= .13, SE= .10, 95% CI[-.03, .36]. Independent self-construal also mediated the relationships between perspective taking and PTSD symptoms effect= -.15, SE= .08, 95% CI[-.32, -.01].

There was no evidence of cultural group moderating this conditional indirect effect, index= -.10, SE= .11, 95% CI[-.38, .06].

**Soothing.** There was evidence of cultural group differences between the conditional indirect effects, index= .24, SE= .13, 95% CI[.02, .52]. Interdependent self-construal mediated the relationships between soothing and PTSD symptoms for the Malaysian group, effect= .18, SE= .09, 95% CI[.01, .38], but not the Australian group, effect= -.06, SE= .06, 95% CI[-.21, .05]. There was no evidence of cultural group moderating the conditional indirect effect for independent self-construal, index= -.09, SE= .07, 95% CI[-.24, .04]. Independent self-construal did not mediate the relationships between soothing and PTSD symptoms effect= -.14, SE= .08, 95% CI[-.32, .001].

**Social Modelling.** There was evidence of cultural group moderating the conditional indirect effects for interdependent self-construal, index= .22, SE= .13, 95% CI[.01, .51]. Interdependent self-construal mediated the relationships between social modelling and PTSD symptoms for the Malaysian group, effect= .24, SE= .16, 95% CI[.04, .49], but not the Australian group, effect= .02, SE= .09, 95% CI[-.13, .23]. Independent self-construal did not mediate the relationships between soothing and PTSD symptoms effect= -.13, SE= .08, 95% CI[-.30, .06]. There was no evidence of cultural group moderating the conditional indirect effect, index= -.09, SE= .11, 95% CI[-.36, .06].
